# Supplementary material for: Electrochemical properties of composite fuel cell cathodes for La5.5WO12−δ proton conducting electrolytes
Source: Royal Society of Chemistry journal article supplement (doi:10.1039/c2jm32061d), 2012-01-01
Supplement: c2jm32061d.pdf [file c2jm32061d.pdf]

## SUPPORTING MATERIAL

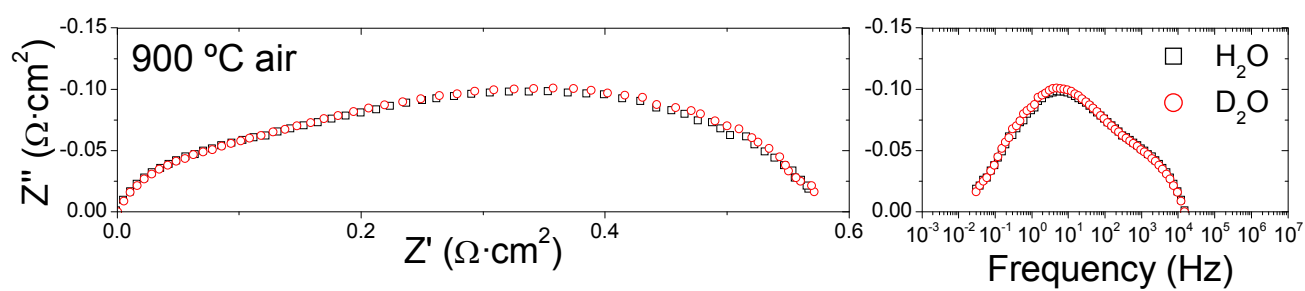

Supporting Figure S1: EIS measurement of LSM/LWO 60/40 vol.% cathode measured at 900 °C in wet air saturated with  $\text{H}_2\text{O}$  and  $\text{D}_2\text{O}$ .

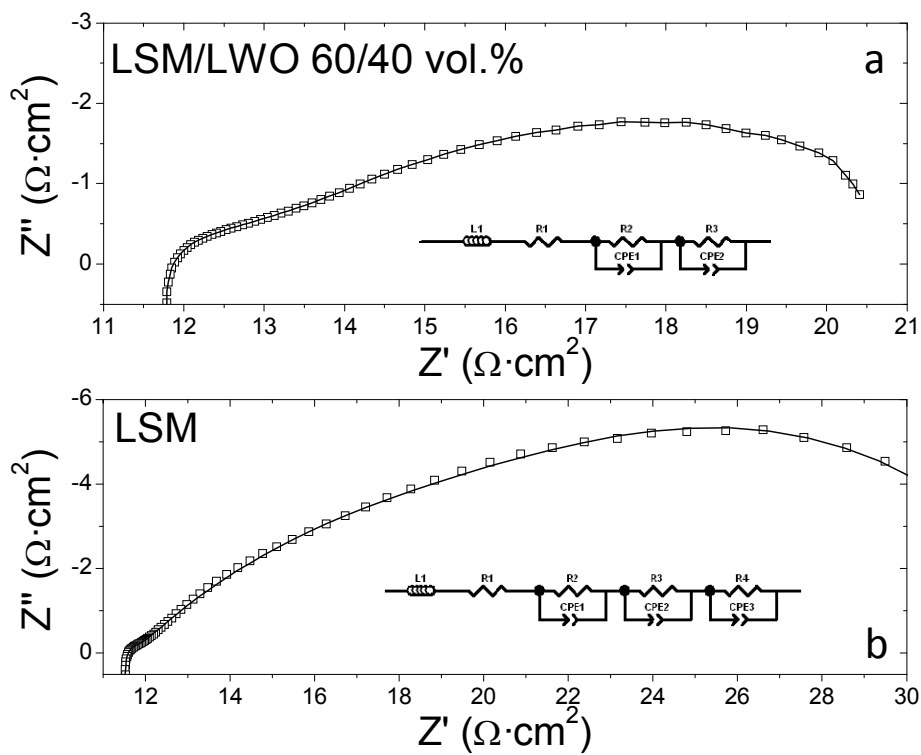

Supporting Figure S2: Nyquist plots showing the experimental data recorded at 800 °C in wet air and the corresponding models fitted for LSM/LWO 60/40 vol.% (a) and LSM (b) cathodes sintered at 1150 °C.
